# Supplementary material for: Tumor and Peritoneum-Associated Macrophage Gene Signature as a Novel Molecular Biomarker in Gastric Cancer
Source: MDPI journal article supplement (doi:10.3390/ijms25074117), 2024-04-08
Supplement: s1 [file s1]

## SUPPLEMENTAL FIGURES:

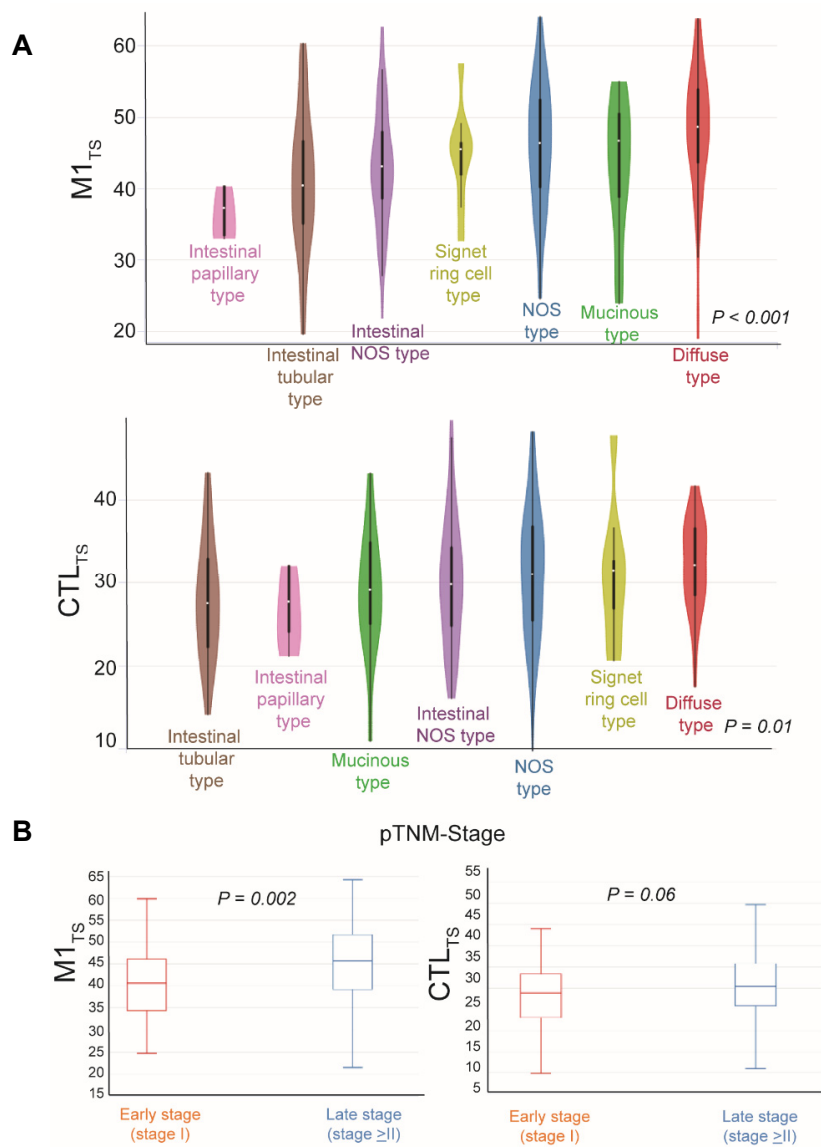

**Supplemental Figure S1.** (A) Histologic subtype for intestinal adenocarcinomas, diffuse adenocarcinoma, mucinous adenocarcinoma, and signet ring cell adenocarcinoma is associated with M1-defining signature and T cell cytolytic signature. (B) Greater M1-defining macrophage expression, but not T cell cytolytic signature expression, is associated with higher stage.

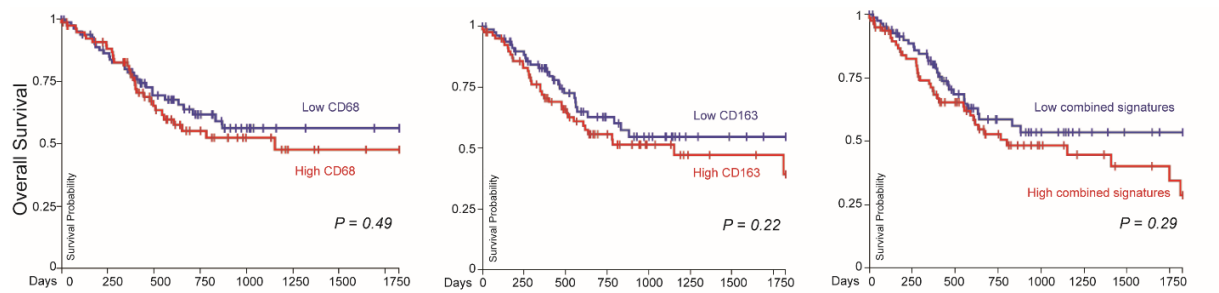

**Supplemental Figure S2.** In primary gastric cancer samples from the TCGA, there is no significant difference in overall survival for single tumor-associated macrophage genes *CD68* and *CD163* nor for combined expression of all M1<sub>TS</sub>, M2<sub>TS</sub>, and CTL<sub>TS</sub>.
